# Supplementary material for: Stability of and Factors Related to Medical Student Specialty Choice of Psychiatry
Source: Atypon-hosted journal article supplement (doi:10.1176/appi.ajp.2017.17020159), 2017-06-16

TABLE S1. Initial 29 Variables, in Order of P Value from Bivariate Analysis (\*= $p < 0.0017$ )

|                                                                                    |
|------------------------------------------------------------------------------------|
| Psychiatry Clerkship Rated Excellent*                                              |
| Undergraduate Psychology Major*                                                    |
| Work/life Balance Strong Influence on Choice*                                      |
| Residents Provided Effective Teaching on Clerkship*                                |
| Substantial Premed LGB Exposure*                                                   |
| Preclinical Behavioral Science Course Prepared Students for Clerkships*            |
| Undergraduate Bachelor of Arts Degree*                                             |
| Age at Matriculation >27*                                                          |
| Took Psychology Course for Personal Interest*                                      |
| Took English Literature Course for Personal Interest*                              |
| Educational Debt No Influence in Specialty Choice*                                 |
| Female*                                                                            |
| Took English Composition for Personal Interest*                                    |
| Opinions of Others Influenced/Changed by Becoming Aware of Different Perspectives* |
| Took Social Sciences Other Than Psychology for Personal Interest*                  |
| Took Humanities Other Than English for Personal Interest*                          |
| Took Advanced General Chemistry for Personal Interest*                             |
| Parent 2 Occupation*                                                               |
| Took Biochemistry for Personal Interest*                                           |
| Took Advanced Organic Chemistry for Personal Interest*                             |
| Fit with Personality, Interest and Skills Strong Influence on Specialty Choice     |
| Worked in Another Career between College and Medical School                        |
| Took Introductory Organic Chemistry for Personal Interest                          |
| Preclinical Neuroscience Course Prepared Students for Clerkships                   |
| Parent 1 Occupation                                                                |
| Medical School Region, Southern and Western vs. Others                             |
| Public vs. Private Medical School                                                  |
| If Took >1 Year Off After College Graduation, Spent Time Travelling                |
| Expected to Participate in Community Service/Activism during Medical School        |

TABLE S2. Odds Ratios from Logistic Regression

| Variables                                                                         | Odds Ratio (95% CI) for Variables in Top 10 Models |                     |                   |
|-----------------------------------------------------------------------------------|----------------------------------------------------|---------------------|-------------------|
|                                                                                   | GQ All                                             | MSQ Not Psych       | MSQ Psych         |
| Psychiatry Clerkship Rated Excellent                                              | 2.66*** (2.26-3.12)                                | 2.59*** (2.05-3.26) | 2.03* (1.11-3.74) |
| Undergraduate Psychology Major                                                    | 2.58*** (2.10-3.17)                                | 1.69** (1.22-2.35)  | 1.73 (0.96-3.14)  |
| Work/life Balance Strong Influence on Choice                                      | 2.25*** (1.96-2.58)                                | 2.80*** (2.29-3.43) | 1.02 (0.93-1.12)  |
| Age at Matriculation >27                                                          | 1.72*** (1.42-2.08)                                | 1.44* (1.09-1.91)   |                   |
| Educational Debt No Influence in Specialty Choice                                 | 1.56*** (1.36-1.79)                                | 1.38** (1.14-1.68)  |                   |
| Parent 2 Occupation                                                               | 1.38** (1.06-1.80)                                 | 1.36 (0.91-2.02)    |                   |
| Took Psychology Course for Personal Interest                                      | 1.31*** (1.13-1.52)                                | 1.39** (1.12-1.72)  | 1.03 (0.91-1.15)  |
| Residents Provided Effective Teaching on Clerkship                                | 1.31*** (1.13-1.51)                                | 1.23 (0.99-1.53)    |                   |
| Took English Literature Course for Personal Interest                              | 1.30*** (1.09-1.55)                                | 1.39** (1.13-1.71)  |                   |
| Substantial Premed LGB Exposure                                                   | 1.28** (1.10-1.48)                                 | 1.28* (1.05-1.56)   | 1.86* (1.08-3.19) |
| Undergraduate Bachelor of Arts Degree                                             | 1.23** (1.07-1.41)                                 | 1.25* (1.02-1.53)   | 0.92 (0.69-1.24)  |
| Female                                                                            | 1.17* (1.02-1.35)                                  | 1.02 (0.94-1.10)    | 1.45 (0.79-2.66)  |
| Opinions of Others Influenced/Changed by Becoming Aware of Different Perspectives | 1.10 (0.94-1.30)                                   | 1.33** (1.09-1.61)  |                   |
| Took English Comp for Personal Interest                                           | 1.03 (0.93-1.14)                                   | 1.00 (0.98-1.02)    |                   |
| Took Social Sciences Other Than Psychology for Personal Interest                  | 1.02 (0.95-1.09)                                   | 1.36* (1.06-1.73)   | 1.53 (0.77-3.02)  |
| Took Humanities Other Than English for Personal Interest                          | 1.00 (0.98-1.02)                                   | 1.00 (0.98-1.02)    |                   |
| Took Advanced Organic Chemistry for Personal Interest                             | 0.96 (0.82-1.12)                                   | 0.98 (0.90-1.07)    |                   |

|                                                                        |                     |                    |                  |
|------------------------------------------------------------------------|---------------------|--------------------|------------------|
| Took Advanced General Chemistry for Personal Interest                  | 0.78** (0.61-0.98)  | 0.82 (0.61-1.11)   | 0.98 (0.90-1.08) |
| Took Biochemistry for Personal Interest                                | 0.73*** (0.62-0.86) | 0.73** (0.59-0.90) |                  |
| Preclinical Behavioral Science Course Prepared Students for Clerkships |                     | 1.00 (0.99-1.02)   | 1.39 (0.72-2.66) |

\*p<0.05, \*\*p<0.01, \*\*\*p<0.001

FIGURE S1. Logistic Regression Results for Students Who Initially Chose Psychiatry (X-axis label is "Odds Ratios")

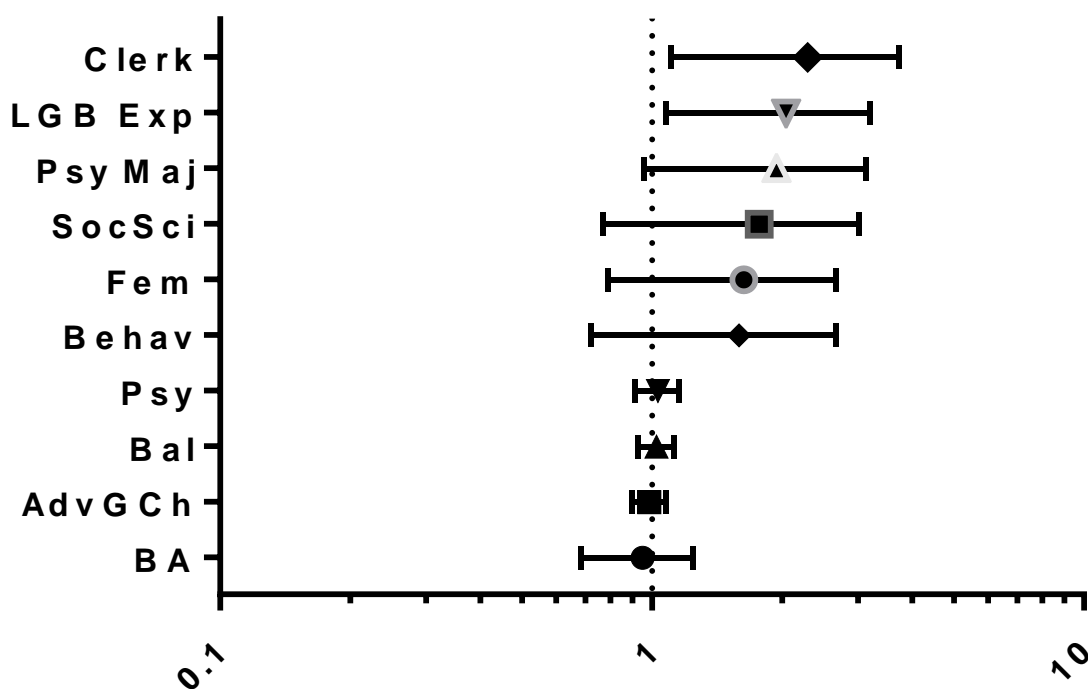

FIGURE S2. Recursive Partitioning Tree for Students Who Initially Chose Psychiatry

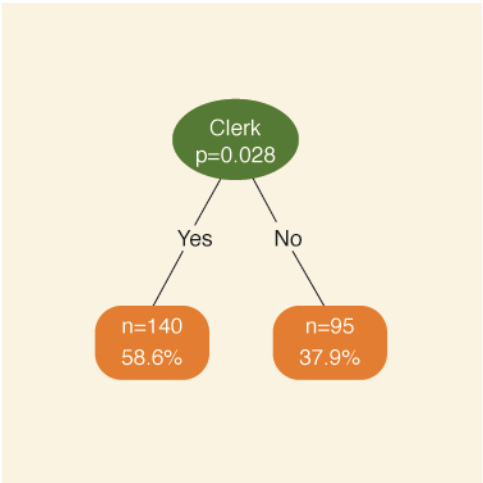

FIGURE S3. Logistic Regression Results for Students Who Initially Chose Other Than Psychiatry (x-axis label is "Odds Ratios")

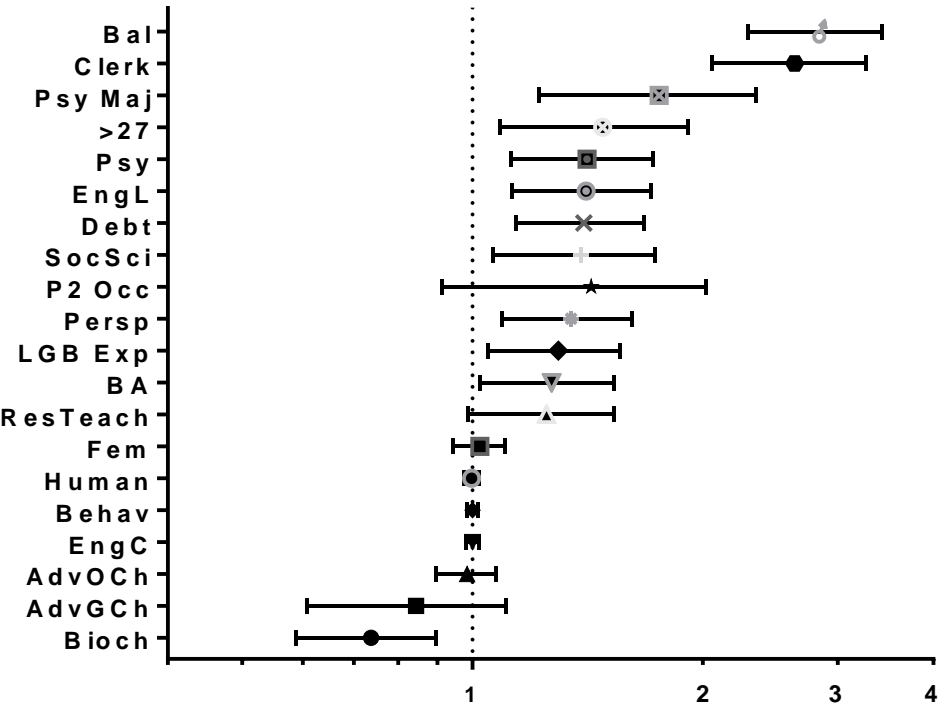

FIGURE S4. Recursive Partitioning Tree for Students Who Initially Chose Other Than Psychiatry

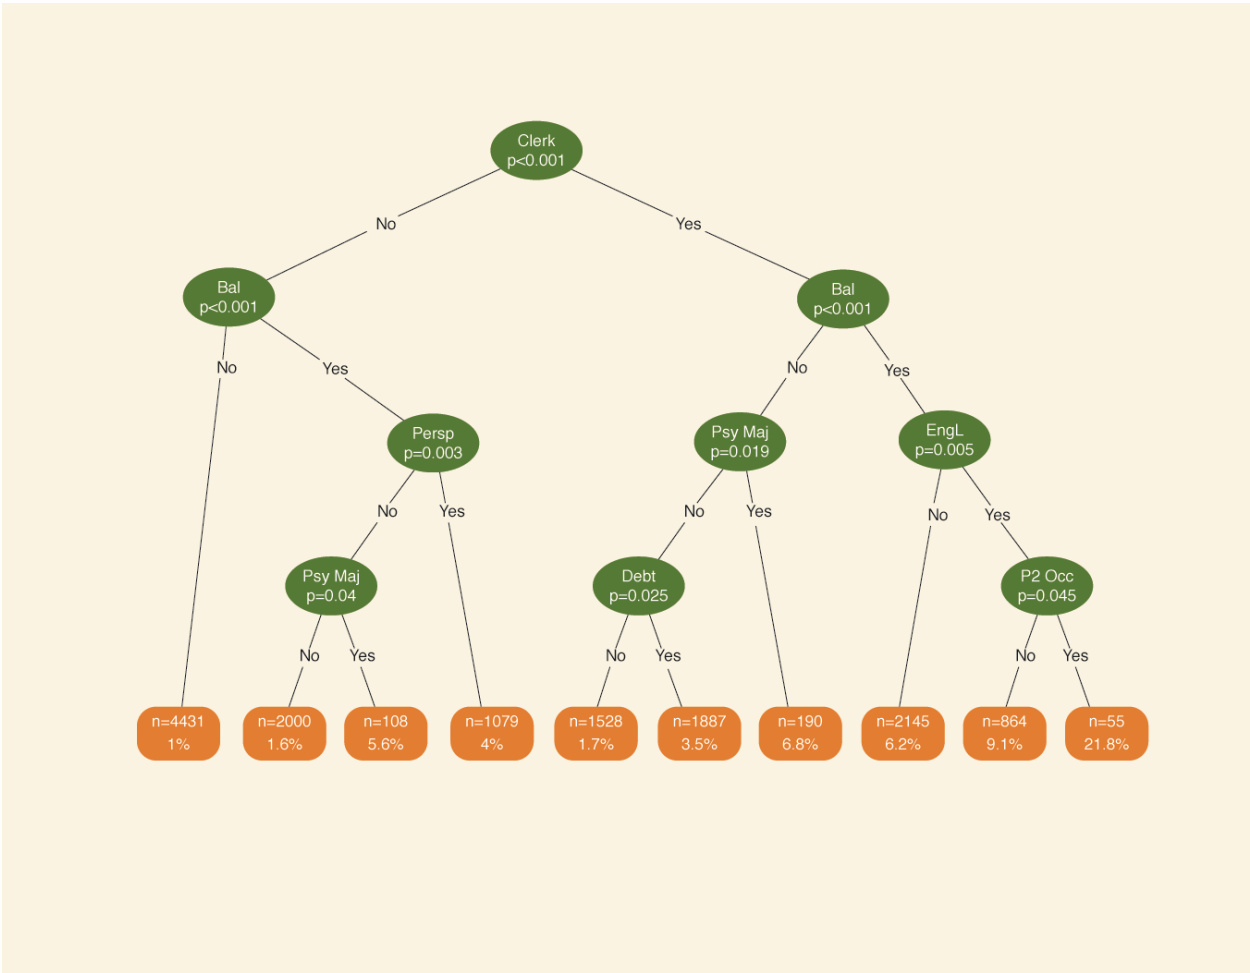

Supplement: appi.ajp.2017.17020159.ds001.pdf [file appi.ajp.2017.17020159.ds001.pdf]
